# Supplementary material
Source: MDPI journal article supplement (https://www.mdpi.com/1999-4907/12/5/533)
Supplement: s1 [file s1]

**Table S1.** The optimal wavelength (nm) of aquatic solutions (caffeine = C, hemicellulose = HC, lignin = L, coniphenyl alcohol = CoA, sinapyl alcohol = SA, coumaryl alcohol - CuA) or cellulose suspension (C).

| Pure chemical       | CF  | C | HC    | L     | CoA   | SA    | CuA   |
|---------------------|-----|---|-------|-------|-------|-------|-------|
| Concentration (g/L) | I   |   |       |       |       |       |       |
| Wavelength (nm)     | 287 | – | 289   | 254   | 292   | 295   | 295   |
| Absorbance (A)      |     | – | 1.012 | 1.680 | 1.850 | 2.999 | 2.847 |

**Table S2.** Data of Dunnett Multiple Comparisons Test (Anova) – comparison of the control (CF - caffeine solution) with other samples containing a mix of caffeine and any of the other components (HC – hemicellulose, L – lignin, CuA – coumaryl alcohol, CoA - coniphenyl alcohol, C – cellulose, SA – sinapyl alcohol).

| Comparison | Difference | q      | Asterisks | P-level    |
|------------|------------|--------|-----------|------------|
| CF vs HC   | 0.1420     | 50.282 | **        | $p < 0.01$ |
| CF vs L    | 0.1097     | 38.833 | **        | $p < 0.01$ |
| CF vs CuA  | 0.2143     | 75.895 | **        | $p < 0.01$ |
| CF vs CoA  | 0.1013     | 35.882 | **        | $p < 0.01$ |
| CF vs SA   | –0.004000  | 1.416  | ns        | $p > 0.05$ |
| CF vs C    | 0.002000   | 0.7082 | ns        | $p > 0.05$ |

**Table S3.** Data of Tukey-Kramer Multiple Comparisons Test (Anova) – comparison of main wood components lignin (L), cellulose (C), and hemicellulose (HC).

| Comparison | Difference | q      | Asterisks | P-level     |
|------------|------------|--------|-----------|-------------|
| L vs C     | –0.1077    | 53.917 | ***       | $p < 0.001$ |
| L vs HC    | –0.03233   | 16.192 | ***       | $p < 0.001$ |
| C vs HC    | –0.1400    | 70.108 | ***       | $p < 0.001$ |

**Table S4.** Data of Tukey-Kramer Multiple Comparisons Test (Anova) – comparison of lignin (L) with its the precursors (CuA – coumaryl alcohol, CoA - coniphenyl alcohol, SA – sinapyl alcohol).

| Comparison | Difference | q      | Asterisks | P-level     |
|------------|------------|--------|-----------|-------------|
| L vs SA    | –0.1137    | 56.921 | ***       | $p < 0.001$ |
| L vs CuA   | 0.1047     | 52.414 | ***       | $p < 0.001$ |
| L vs CoA   | –0.0083    | 4.173  | ns        | $p > 0.050$ |

|            |         |        |     |             |
|------------|---------|--------|-----|-------------|
| CuA vs SA  | −0.2183 | 109.34 | *** | $p < 0.001$ |
| CuA vs CoA | −0.1130 | 56.587 | *** | $p < 0.001$ |
| SA vs CoA  | 0.1053  | 52.748 | *** | $p < 0.001$ |

---
